# Supplementary material for: Anabolic Factors and Myokines Improve Differentiation of Human Embryonic Stem Cell Derived Skeletal Muscle Cells
Source: Cells. 2022 Mar 11;11(6):963. doi: 10.3390/cells11060963 (PMC8946006; doi:10.3390/cells11060963)
Supplement: Supplementary file 1 [file cells-11-00963-s001.zip]

Archive with 10 entries (10 files):
- cells-1608848-supplementary figures.pdf
- cells-1608848-supplementary file S1.zip
- cells-1608848-supplementary file S2.zip
- cells-1608848-supplementary file S3.zip
- cells-1608848-supplementary file S4.zip
- cells-1608848-supplementary file S5.zip
- cells-1608848-supplementary file S6.zip
- cells-1608848-supplementary file S7.zip
- cells-1608848-supplementary file S8.zip
- cells-1608848-Supplementary Tables.zip
